# Supplementary material for: Runx2-Twist1 interaction coordinates cranial neural crest guidance of soft palate myogenesis
Source: eLife. 2021 Jan 22;10:e62387. doi: 10.7554/eLife.62387 (PMC7826157; doi:10.7554/eLife.62387)
Supplement: Figure 3—figure supplement 2—source data 1. [file elife-62387-fig3-figsupp2-data1.xlsx]

## Sheet: Sheet1
	Control			Osr2-KICre;Runx2fl/fl
Pterygoid plate length	1	1	1	0.735099	0.645695	0.625828
Pterygoid plate height	1	1	1	0.483871	0.387097	0.419355
