# Supplementary material for: Runx2-Twist1 interaction coordinates cranial neural crest guidance of soft palate myogenesis
Source: eLife. 2021 Jan 22;10:e62387. doi: 10.7554/eLife.62387 (PMC7826157; doi:10.7554/eLife.62387)
Supplement: Figure 3—figure supplement 2—source data 2. [file elife-62387-fig3-figsupp2-data2.xlsx]

## Sheet: Sheet1
	Control			Osr2-KICre;Runx2fl/fl
Length 1-4	1	1	1	0.992	0.974	0.88
Width 3-5	1	1	1	0.908	0.912	0.68
Width L3-R3	1	1	1	0.989	1.02	0.94
Height	1	1	1	0.857	0.979	0.875
Pterygoid plate length	1	1	1	1.09	0.92	0.98
Pterygoid plate height	1	1	1	0.857	0.73	0.778
