# Supplementary material for: Runx2-Twist1 interaction coordinates cranial neural crest guidance of soft palate myogenesis
Source: eLife. 2021 Jan 22;10:e62387. doi: 10.7554/eLife.62387 (PMC7826157; doi:10.7554/eLife.62387)
Supplement: Figure 4—source data 1. [file elife-62387-fig4-data1.xlsx]

## Sheet: E14.5 CNC proliferation rate
BrdU(+) cells/total MyoD(-) cells
Control	Mutant
0.305449	0.230186
0.241652	0.155879
0.358283	0.305573

## Sheet: E14.5 Myogenic cell proliferati
BrdU(+) cells/total MyoD(+) cells
Control	Mutant
0.189349	0.133333
0.24	0.221
0.217791	0.222222

## Sheet: E15.5_CNC_proliferation
BrdU(+) cells/total MyoD(-) cells
Control	Mutant
0.283376	0.213522
0.233433	0.200664
0.219685	0.187931

## Sheet: E15.5_myogenic_proliferation
BrdU(+) cells/total MyoD(+) cells
Control	Mutant
0.165775	0.115217
0.177778	0.0721393
0.148615	0.116279
