# Supplementary material for: Runx2-Twist1 interaction coordinates cranial neural crest guidance of soft palate myogenesis
Source: eLife. 2021 Jan 22;10:e62387. doi: 10.7554/eLife.62387 (PMC7826157; doi:10.7554/eLife.62387)
Supplement: Figure 6—source data 1. [file elife-62387-fig6-data1.xlsx]

## Sheet: Sheet1
	Control					Osr2-KICre;Runx2fl/fl					Osr2-KICre;Runx2fl/fl;Twist1fl/+
Pterygoid plate height	1	1	1	1	1	0.735632	0.693069	0.797414	0.771429	0.621622	0.908046	0.826733	0.918103	0.861111	1.08
